# Supplementary material for: A graphene–cobalt oxide based needle electrode for non-enzymatic glucose detection in micro-droplets
Source: Royal Society of Chemistry journal article supplement (doi:10.1039/c2cc32674d), 2012-01-01
Supplement: c2cc32674d.pdf [file c2cc32674d.pdf]

Electronic Supplementary Information

## Graphene – cobalt oxide based needle electrode for non-enzymatic glucose detection in micro-droplets

Xuewan Wang, Xiaochen Dong, Yanqin Wen, Changming Li, Qihua Xiong and Peng Chen\*

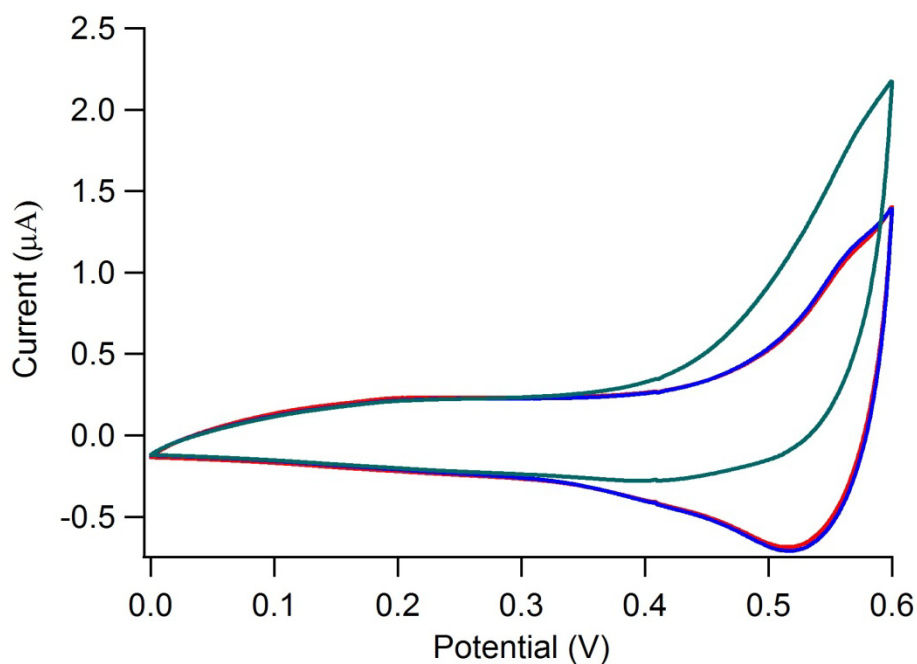

**Figure S1.** Cyclic voltammograms (CVs) of the graphene/Co<sub>3</sub>O<sub>4</sub> nanoneedle electrode in 0.1 M NaOH electrolyte (red), electrolyte supplemented with glucose-free serum sample (blue), electrolyte supplemented with glucose-containing serum sample (green, final glucose concentration = 3 mM). The serum sample is made of 100 μg/ml fetal bovine serum in Dulbecco's Modified Eagle Medium (DMEM).
